# Supplementary material for: ECG is an inefficient screening-tool for left ventricular hypertrophy in normotensive African children population
Source: PeerJ. 2016 Sep 7;4:e2439. doi: 10.7717/peerj.2439 (PMC5018662; doi:10.7717/peerj.2439)
Supplement: Supplemental Information 1 [file peerj-04-2439-s001.xls]

## Sheet: Foglio1
n°	Sex	Age	Height	Weight	BMI	CC°/BMI	Body Surface Area	Systolic BP	Diastolic BP	Heart murmur	Risk factors	Sinus Rhythm	Sinus Arrhytmia	Atrial fibrillation	heart rate	PR segment	Short PR	QRS	Axis	Axis deviation	T wave abnormalities	Sokolow	P wave anomalies	Cond. AV	QT	QTc	End-diastolic diameter Left ventricle	Interventricular Septum	Posterior wall	RDW
1	1	11	1.34	28	15.5937	25°	1015	110	70	0		1	0	0	77	132	0	78	63	0	0	31	0	0	390	441	36	8	5	0.277778
2	0	11	1.31	27	15.7333	25°	0.986	120	80	0		1	0	0	123	144	0	68	61	0	0	28	0	0	306	434	38	9	6	0.315789
3	0	10	1.23	24.4	16.128	25-50°	0.345	120	70	0		0	1	0	79	130	0	78	48	0	1	47	0	0	378	439	36	11	8	0.444444
4	0	12	1.36	33	17.8417	50°	1115	120	75	0		1	0	0	89	162	0	74	26	0	0	19	0	0	380	462	33	5	5	0.30303
5	0	5	1.17	18.9	13.8067	10°	0.522	120	80	0		0	1	0	135	108	0	68	58	0	0	14	right atrial enlargment	0	284	426	29	6	5	0.344828
6	0	10	1.23	21.6	14.2772	5-10°	0.428	100	60	0		1	0	0	99	128	0	66	72	0	0	26	0	0	332	426	28	7	6	0.428571
7	0	14	1.49	40	18.0172	25°	1282	120	80	1 (sist 3/6)		1	0	0	84	162	0	106	40	0	0	21	0	0	360	425	37	6	6	0.324324
8	0	7	1.14	21.3	16.3897	50-75°	0.286	110	70	0		1	0	0	111	126	0	76	21	0	1	16	0	0	356	484	35	9	6	0.342857
9	0	10	1.28	26.5	16.1743	25-50°	0.395	120	70	0		1	0	0	122	146	0	68	100	1	0	15	0	0	318	453	35	6	4	0.228571
10	0	11	1.4	34	17.3469	50°	1146	115	65	1 (sist 2/6)		1	0	0	102	124	0	68	26	0	1	45	0	0	362	471	40	6	5	0.25
11	0	4	1.07	16.5	14.4117	15°	0.368	120	80	1 (sist 3/6)		1	0	0	103	134	0	60	71	0	1	21	0	0	344	450	34	5	5	0.294118
12	0	8	1.29	23	13.8213	10°	0.899	120	80	0		1	0	0	89	142	0	64	51	0	0	30	0	0	346	420	35	8	6	0.342857
13	0	10	1.4	29	14.7959	10°	1052	120	75	0		0	1	0	71	126	0	76	41	0	0	35	0	0	376	408	38	7	6	0.315789
14	0	9	1.28	25.5	15.564	25-50°	0.395	120	80	0		0	1	0	88	140	0	66	73	0	0	21	0	0	346	418	35	8	5	0.285714
15	0	8	1.24	22.7	14.7633	25°	0.467	120	80	0		0	1	0	95	136	0	70	47	0	1	29	0	0	350	440	35	8	6	0.342857
16	1	6	1.16	21.5	15.978	50-75°	0.38	120	80	1 (sist 3/6)		1	0	0	112	148	0	66	25	0	0	60	0	0	312	425	35	7	6	0.342857
17	0	8	1.21	23	15.7093	25-50°	0.877	120	80	0		0	1	0	83	132	0	78	65	0	1	24	0	0	380	446	34	7	6	0.352941
18	0	5	1.07	17.5	15.2852	50°	0.368	120	75	0		0	1	0	86	166	0	68	53	0	1	22	0	0	370	435	33	5	5	0.30303
19	0	7	1.24	22	14.308	15°	0.865	100	60	0		0	1	0	89	122	0	66	80	0	1	20	0	0	368	464	37	6	4	0.216216
20	0	9	1.25	21.6	13.824	5°	0.431	120	80	0		0	1	0	84	156	0	74	12	0	0	33	0	0	338	399	40	6	6	0.3
21	0	8	1.24	19.6	12.7471	<3°	0.43	110	70	1 (sist 3/6)		1	0	0	85	114	1	66	76	0	0	11	0	0	354	421	38	6	5	0.263158
22	0	7	1.2	23.4	16.25	50-75°	0.341	120	80	0		1	0	0	120	170	0	80	68	0	0	25	0	0	320	450	36	6	6	0.333333
23	0	8	1.18	23.4	16.8055	50-75°	0.339	120	80	0		1	0	0	107	134	0	64	31	0	0	27	0	0	348	464	35	8	5	0.285714
24	0	9	1.26	20	12.5976	<3°	0.827	120	70	1 (sist 2/6)		0	1	0	88	134	0	62	79	0	0	23	0	0	328	396	37	9	6	0.324324
25	0	8	1.27	24.8	15.376	25-50°	0.507	120	70	0		1	0	0	96	134	0	80	79	0	0	15	0	0	340	429	36	8	6	0.333333
26	0	9	1.22	21.5	14.445	15°	0.387	115	65	1 (sist 2/6)		0	1	0	63	132	0	80	63	0	0	25	0	0	404	439	37	5	5	0.27027
27	0	10	1.32	27.7	15.8976	25-50°	0.479	120	80	0		1	0	0	85	128	0	84	68	0	0	18	0	0	354	435	31	8	6	0.387097
28	0	8	1.21	24.3	16.5972	50-75°	0.293	115	65	0		1	0	0	90	172	0	76	81	0	0	17	0	0	343	418	40	6	4	0.2
29	0	9	1.3	24	14.2012	10°	0.923	110	70	0		0	1	0	77	160	0	78	81	0	0	21	0	0	362	409	39	6	6	0.307692
30	0	8	1.3	26.8	15.858	50°	0.511	110	70	0		1	0	0	95	122	0	64	51	0	0	31	0	0	378	480	43	8	6	0.27907
31	0	11	1.23	25	16.5246	25-50°	0.923	120	70	1 (sist 2/6)		1	0	0	89	106	1	76	59	0	0	14	0	0	344	417	41	6	5	0.243902
32	0	8	1.31	25.7	14.9758	25°	0.477	110	70	0		1	0	0	93	126	0	64	76	0	0	27	right axial deviation	0	362	450	38	7	6	0.315789
33	1	13	1.52	42.5	18.3951	50°	0.422	120	80	0		1	0	0	91	147	0	100	67	0	0	29	0	0	360	444	39	5	5	0.25641
34	0	16	1.69	51.2	17.9265	10°	0.269	100	60	1 (sist 2/6)		0	1	0	78	160	0	100	65	0	0	19	0	0	380	439	43	8	6	0.27907
35	1	7	1.18	20.5	14.7228	25°	0.382	120	70	0		1	0	0	96	192	0	101	45	0	0	12	0	0	380	481	34	9	6	0.352941
36	1	5	1.15	17.7	13.3837	<3°	0.453	115	65	0		1	0	0	99	162	0	87	72	0	0	26	0	0	360	462	28	6	6	0.428571
37	1	4	0.98	15.7	16.3474	75°	0.425	110	70	0		0	1	0	74	135	0	90	25	0	0	26	0	0	380	422	33	6	4	0.242424
38	1	5	1.1	19.9	16.4463	75°	0.51	110	70	0		0	1	0	66	142	0	92	30	0	0	18	0	0	395	414	33	8	6	0.363636
39	0	7	1.12	21	16.7411	75°	0.81	120	80	0		1	0	0	83	145	0	107	26	0	0	27	0	0	380	451	28	8	5	0.357143
40	0	28	1.6	59	23.0469	Normal weight	1607	135	80	1 (sist 2/6)	0	1	0	0	97	116	1	82	70	0	1	No Ecg	0	0	416	528	48	12	10	0.416667
41	0	36	1.6	51	19.9219	Normal weight	1.51	120	70	0	0	1	0	0	77	156	0	78	34	0	0	22	0	0	382	432	41	11	11	0.536585
42	0	4	0.95	13.5	14.9584	25-50°	0.351	120	80	0		1	0	0	131	126	0	52	41	0	0	35	0	0	282	416	38	7	6	0.315789
43	0	32	1.57	47	19.0677	Normal weight	1439	110	70	1 (sist 2/6)	0	1	0	0	106	132	0	84	70	0	0	33	0	0	344	456	48	10	9	0.375
44	1	9	1.38	28	14.7028	15°	1027	120	75	0		1	0	0	91	98	0	72	66	0	0	27	0	0	340	418	39	8	6	0.307692
45	0	30	1.7	58	20.0692	Normal weight	1667	120	90	0	smoke	1	0	0	76	134	0	78	69	0	1	24	0	0	400	450	44	9	9	0.409091
46	1	37	1.87	72	20.5897	Normal weight	1958	110	80	0	smoke, hbp	1	0	0	79	154	0	84	62	0	0	32	0	0	354	405	51	11	10	0.392157
47	0	42	1.64	53.9	20.0402	Normal weight	0.736	130	80	0	0	1	0	0	89	118	1 (delta)	70	38	0	0	23	0	0	368	447	45	7	6	0.266667
48	0	40	1.55	63	26.2227	Over weight	1615	130	90	0	hbp	1	0	0	81	152	0	84	34	0	0	21	0	0	402	466	46	9	7	0.304348
49	0	38	1.5	62	27.5556	Over weight	1566	120	60	0	0	1	0	0	68	144	0	78	73	0	0	20	0	0	364	387	40	8	8	0.4
50	1	36	1.7	68	23.5294	Normal weight	1783	120	70	1 (sist 2/6)	0	1	0	0	98	152	0	86	39	0	0	34	0	0	320	408	47	9	7	0.297872
51	0	16	1.6	56	21.875	50-75°	1581	110	70	0		1	0	0	118	180	0	92	51	0	1	39	0	0	316	442	49	6	5	0.204082
52	0	23	1.58	40.4	16.1833	Under weight	0.507	110	80	0	0	1	0	0	111	164	0	62	53	0	0	20	0	0	322	437	47	11	11	0.468085
53	0	60	1.52	68.5	29.6485	Over weight	0.542	120	70	0	0	1	0	0	75	138	0	80	42	0	0	31	0	0	362	404	46	13	8	0.347826
54	1	5	1.28	24.4	14.8926	25°	0.35	120	70	1 (sist 2/6)		1	0	0	95	178	0	80	8	0	0	29	0	0	363	454	35	5	5	0.285714
55	1	27	1.7	57	19.7232	Normal weight	1655	130	60	0	0	1	0	0	65	158	0	80	61	0	0	17	0	0	362	376	44	6	6	0.272727
56	1	4	0.97	16.6	17.6427	90°	0.39	115	65	0		1	0	0	127	102	1	74	69	0	0	20	0	0	342	497	32	6	6	0.375
57	1	4	0.91	14.5	17.51	90°	0.345	120	75	0		1	0	0	139	98	1	62	31	0	0	18	0	0	300	456	32	7	6	0.375
58	1	38	1.68	63	22.3214	Normal weight	1712	140	80	0	0	1	0	0	68	166	0	74	37	0	0	34	0	0	354	413	43	9	6	0.27907
59	1	4	0.97	14.7	15.6233	50°	0.424	100	60	0		1	0	0	120	116	1	58	36	0	1	42	0	0	296	418	33	6	4	0.242424
60	0	4	1	16	16	50-75°	0.669	120	70	0		1	0	0	115	128	0	60	34	0	0	34	0	0	338	467	29	9	6	0.413793
61	1	4	1.2	20	13.8889	5°	0.811	110	70	0		1	0	0	147	132	0	78	21	0	0	24	0	0	312	488	37	8	5	0.27027
62	1	4	0.97	15.6	16.5799	75°	0.39	120	70	1 (sist 2/6)		1	0	0	117	121	0	66	71	0	1	26	0	0	326	454	33	6	5	0.30303
63	1	4	0.99	14	14.2843	10°	0.62	110	70	0		1	0	0	103	112	1	70	55	0	1	26	0	0	344	450	34	5	5	0.294118
64	0	4	0.88	11.2	14.4628	15°	0.208	120	80	0		0	1	0	93	132	0	68	35	0	0	23	0	0	338	420	35	5	5	0.285714
65	0	4	0.97	18.5	19.662	>97°	0.354	110	70	0		1	0	0	98	130	0	62	89	0	0	17	0	0	348	444	34	6	6	0.352941
66	0	4	0.96	23.2	25.1736	>97°	0.215	120	70	0		1	0	0	123	120	0	68	97	1	1	19	0	0	312	446	33	8	5	0.30303
67	1	4	1.03	15	14.1389	5°	0.654	115	65	0		1	0	0	112	136	0	72	68	0	1	22	0	0	340	464	34	5	5	0.294118
68	0	4	0.97	13.8	14.6668	25°	0.455	120	75	0		1	0	0	123	92	1	68	74	0	1	21	0	0	318	455	33	6	6	0.363636
69	1	4	0.92	13.5	15.9499	50°	0.346	120	70	1 (sist 2/6)		1	0	0	115	146	0	82	92	1	0	19	0	0	322	445	33	6	6	0.363636
70	0	4	0.99	13.8	14.0802	10°	0.459	120	70	0		1	0	0	123	120	0	72	35	0	0	14	0	0	322	462	32	5	5	0.3125
71	0	4	1.05	16.2	14.6939	25°	0.223	110	70	0		1	0	0	93	142	0	77	22	0	0	18	0	0	340	423	35	8	5	0.285714
72	0	4	0.98	16.1	16.7638	50°	0.149	100	60			1	0	0	105	124	0	70	11	0	0	25	0	0	334	441	33	6	5	0.30303
73	1	4	0.95	15	16.6205	75°	0.633	120	70	1 (sist 2/6)		1	0	0	120	120	0	68	86	0	1	16	0	0	316	446	28	9	6	0.428571
74	0	4	1.01	15.7	15.3906	50°	0.431	120	75	0		1	0	0	86	145	0	82	64	0	1	16	0	0	422	505	31	7	6	0.387097
75	1	4	0.98	15	15.6185	50°	0.641	120	70	0		1	0	0	94	144	0	66	93	1	0	12	0	0	348	435	30	6	6	0.4
76	0	4	0.94	15.7	17.7682	90-95°	0.418	110	70	0		1	0	0	104	114	1	58	69	0	0	36	0	0	426	428	31	6	6	0.387097
77	1	4	0.97	14	14.8794	25°	0.615	100	60	0		1	0	0	149	102	1	68	51	0	0	65	0	0	310	488	33	5	5	0.30303
78	1	4	1.02	14.8	14.2253	5-10°	0.464	120	70	0		1	0	0	123	118	1	66	82	0	0	26	0	0	316	452	33	7	6	0.363636
79	1	4	0.95	14.8	16.3989	75°	0.451	110	70	0		1	0	0	115	160	0	98	62	0	0	14	0	0	366	506	33	6	6	0.363636
80	1	4	0.96	13	14.1059	5°	0.589	100	60	1 (sist 2/6)		1	0	0	116	114	1	76	48	0	0	42	0	0	340	472	35	8	5	0.285714
81	0	4	0.99	15.5	15.8147	25-50°	0.356	120	70	0		1	0	0	104	110	1	66	70	0	1	14	0	0	332	436	32	6	5	0.3125
82	1	4	0.95	14	15.5125	50°	0.61	120	70	0		1	0	0	121	100	1	64	42	0	0	22	0	0	306	434	30	9	6	0.4
83	0	4	1.01	14	13.7241	3°	0.625	100	60	0		1	0	0	101	114	1	60	29	0	0	18	0	0	312	404	33	7	6	0.363636
84	1	4	0.97	13	13.8166	5°	0.591	120	75	0		1	0	0	111	120	0	74	20	0	0	16	0	0	316	429	34	6	6	0.352941
85	0	4	1.03	18	16.9667	75-80°	0.721	100	60	0		1	0	0	128	120	0	66	61	0	0	23	0	0	320	467	35	6	4	0.228571
86	1	4	0.97	14.8	15.7296	50°	0.455	120	80	0		1	0	0	123	140	0	103	1	0	0	13	0	0	336	481	32	5	5	0.3125
87	1	4	1	18.5	18.5	>97°	0.358	110	70	0		1	0	0	129	138	0	70	85	0	0	14	0	0	292	427	33	9	6	0.363636
88	0	4	0.95	13	14.4044	10-25°	0.586	120	70	0		1	0	0	125	114	1	62	33	0	0	19	0	0	294	424	33	5	5	0.30303
89	1	4	1.03	14.7	13.8562	5°	0.434	120	75	0		0	1	0	97	100	1	68	63	0	0	17	0	0	344	436	33	6	5	0.30303
90	1	4	0.99	13.6	13.8761	5°	0.393	120	80	0		1	0	0	104	120	0	66	44	0	0	23	0	0	336	441	32	5	5	0.3125
91	0	4	1	12.7	12.7	<3°	0.429	120	70	0		1	0	0	108	128	0	103	42	0	0	24	0	0	324	434	30	6	6	0.4
92	0	4	0.98	12.7	13.2237	3°	0.425	115	65	0		1	0	0	118	128	0	74	75	0	0	25	0	0	306	428	31	5	5	0.322581
93	0	4	0.95	12.6	13.9612	10°	0.387	120	70	0		1	0	0	101	122	0	62	58	0	0	14	0	0	336	435	32	7	6	0.375
94	1	4	0.98	15.4	16.035	50-75°	0.315	120	80	0		1	0	0	122	114	1	62	72	0	0	20	0	0	306	436	34	5	5	0.294118
95	1	4	1.05	15	13.6054	3°	0.659	120	75	0		1	0	0	130	122	0	62	47	0	0	9	0	0	338	446	33	8	5	0.30303
96	0	4	1.01	15.3	14.9985	10-25°	0.273	120	80	0		1	0	0	115	122	0	66	63	0	1	27	right atrial enlargment	0	326	450	34	7	5	0.294118
97	1	4	0.98	12.6	13.1195	<3°	0.392	110	70	0		0	1	0	128	124	0	68	20	0	0	33	0	0	318	464	28	6	5	0.357143
98	0	4	1.02	15.3	14.7059	25°	0.274	120	80	0		1	0	0	113	138	0	68	43	0	0	30	0	0	324	444	30	6	6	0.4
99	1	4	1	13.5	13.5	3°	0.358	120	80	1 (sist 2/6)		1	0	0	110	136	0	64	30	0	1	19	0	0	314	424	26	5	5	0.384615
100	0	4	1.05	18	16.3265	75°	0.727	115	65	0		1	0	0	111	140	0	80	71	0	0	18	0	0	338	459	33	7	6	0.363636
101	1	7	1.14	20.1	15.4663	50°	0.159	100	60	0		0	1	0	83	122	0	76	56	0	0	41	0	0	368	432	32	8	5	0.3125
102	1	7	1.23	22	14.5416	25°	0.862	120	80	1 (sist 2/6)		1	0	0	97	120	0	66	41	0	0	22	0	0	322	408	39	7	6	0.307692
103	1	7	1.19	23.4	16.5243	75°	0.34	120	70	0		0	1	0	96	130	0	92	6	0	0	26	0	0	362	457	32	9	6	0.375
104	1	5	1.25	25	16	75°	0.929	110	70	0		1	0	0	98	134	0	72	56	0	1	32	0	0	364	464	34	5	5	0.294118
105	1	7	1.2	19.5	13.5417	3°	0.385	120	70	0		1	0	0	88	124	0	80	46	0	0	30	0	0	372	450	33	6	6	0.363636
106	0	7	1.22	21	14.1091	15°	0.838	120	80	1 (sist 2/6)		1	0	0	116	114	1	76	72	0	0	38	0	0	322	447	33	8	5	0.30303
107	0	5	1.06	16	14.2399	10°	0.685	120	75	0		1	0	0	114	142	0	66	73	0	0	24	0	0	341	432	32	6	5	0.3125
108	0	6	1.06	13	11.57	<3°	0.612	120	70	1 (sist 4/6)		1	0	0	123	182	0	78	34	0	0	20	biatrial enlargment	0	280	400	37	9	6	0.324324
109	0	6	1.16	17	12.6338	<3°	0.733	100	60	0		0	1	0	90	128	0	70	34	0	0	31	0	0	380	464	34	8	5	0.294118
110	1	7	1.19	23	16.2418	50-75°	0.871	120	70	0		1	0	0	79	136	0	74	65	0	1	44	0	0	360	412	35	8	5	0.285714
111	0	7	1.14	18	13.8504	10°	0.751	120	80	0		1	0	0	98	142	0	78	71	0	0	25	0	0	322	411	33	8	5	0.30303
112	0	7	1.19	21	14.8295	25°	0.83	110	70	0		1	0	0	104	108	1	88	73	0	0	30	0	0	344	452	37	6	5	0.27027
113	0	7	1.19	18	12.711	<3°	0.764	120	70	0		0	1	0	105	116	1	76	82	0	1	47	0	0	316	417	35	6	4	0.228571
114	0	8	1.23	22	14.5416	15°	0.862	120	75	0		1	0	0	109	124	0	70	30	0	1	33	0	0	330	444	32	5	5	0.3125
115	0	8	1.23	25	16.5246	50-75°	0.923	120	70	0		1	0	0	93	134	0	88	56	0	1	29	0	0	350	435	34	6	6	0.352941
116	0	9	1.29	23	13.8213	5°	0.899	120	80	0		1	0	0	125	120	0	60	46	0	0	31	0	0	286	412	34	7	6	0.352941
117	0	6	1.2	20	13.8889	10°	0.811	100	60	0		0	1	0	81	134	0	80	82	0	1	26	0	0	352	408	34	9	6	0.352941
118	1	6	1.17	21	15.3408	50°	0.824	120	70	0		1	0	0	98	144	0	72	65	0	0	29	0	0	340	434	33	7	6	0.363636
119	0	7	1.15	20	15.1229	50°	0.797	120	70	0		1	0	0	90	144	0	68	45	0	0	22	0	0	338	413	33	9	6	0.363636
120	0	7	1.14	19	14.6199	25°	0.773	110	70	0		0	1	0	86	125	0	77	75	0	0	14	0	0	387	465	35	8	5	0.285714
121	0	7	1.21	24.3	16.5972	75°	0.293	120	80	0		1	0	0	166	120	0	90	51	0	1	14	0	0	292	486	35	6	5	0.285714
122	0	32	1.65	56	20.5693	Normal weight	1607	110	80	0	0	1	0	0	62	172	0	90	52	0	0	43	0	0	417	425	40	11	8	0.4
123	0	10	1.39	28.8	14.9061	15°	0.525	115	65	0		0	1	0	83	150	0	87	72	0	0	26	0	0	387	456	35	5	5	0.285714
124	1	8	1.24	22.6	14.6982	15°	0.43	120	70	0		1	0	0	112	175	0	115	84	0	0	22	0	0	385	527	36	8	5	0.277778
125	0	7	1.16	18.2	13.5256	5°	0.232	100	60	0		1	0	0	102	130	0	120	98	1	1	30	0	0	410	476	37	7	6	0.324324
126	0	7	1.24	22.5	14.6332	25°	0.39	120	80	0		1	0	0	116	170	0	100	81	0	0	27	0	0	410	540	35	7	6	0.342857
127	0	7	1.16	17	12.6338	<3°	0.733	120	75	0		1	0	0	109	100	1	77	49	0	1	20	0	0	345	466	33	6	6	0.363636
128	1	55	1.65	60	22.0386	Normal weight	1655	140	80	0	HBP	1	0	0	59	217	0	90	17	0	0	46	0	1	520	519	47	10	9	0.382979
129	1	10	1.39	32.7	16.9246	50-75°	0.489	110	70	0		1	0	0	87	225	0	87	138	1	1	11	0	1	365	441	36	9	6	0.333333
130	0	7	1.15	21.9	16.5595	75°	0.519	120	80	0		0	1	0	125	127	0	85	55	0	0	15	0	0	372	435	34	6	6	0.352941
131	0	7	1.2	21.2	14.7222	25°	0.235	120	70	0		0	1	0	82	17	0	80	71	0	0	22	0	0	377	442	34	7	6	0.352941
132	0	8	1.18	20.8	14.9382	25°	0.492	120	75	0		0	1	0	96	147	0	80	33	0	0	20	0	0	390	493	35	8	5	0.285714
133	1	9	1.38	29.7	15.5955	25-50°	0.487	120	70	0		1	0	0	110	135	0	90	-2	0	0	9	0	0	377	432	36	6	5	0.277778
134	1	7	1.26	23.1	14.5503	25°	0.165	110	70	0		1	0	0	105	142	0	80	43	0	0	21	0	0	352	467	37	6	6	0.324324
135	0	8	1.2	17.2	11.9444	<3°	0.235	110	70	1 (sist 2/6)		1	0	0	129	152	0	117	93	1	1	21	0	0	392	443	36	6	6	0.333333
136	1	5	1.13	19.2	15.0364	25°	0.229	120	80	0		1	0	0	94	137	0	95	60	0	0	31	0	0	345	432	33	8	5	0.30303
137	1	4	1.02	15.2	14.6098	15°	0.22	120	70	0		1	0	0	149	132	0	97	57	0	0	27	0	0	337	445	34	5	5	0.294118
138	0	4	1.02	16.2	15.5709	50-75°	0.22	100	60	0		1	0	0	103	132	0	78	13	0	0	41	0	0	318	376	33	6	6	0.363636
139	1	63	1.58	42	16.8242	Under weight	1378	110	70	0	0	1	0	0	80	152	0	102	75	0	0	28	0	0	380	444	47	12	11	0.468085
140	1	10	1.36	26.2	14.1652	5°	0.247	110	70	0		1	0	0	73	160	0	90	69	0	0	73	0	0	475	527	39	6	6	0.307692
141	1	8	1.22	21.1	14.1763	10°	0.163	110	70	0		0	1	0	79	117	1	92	89	0	0	27	0	0	432	498	36	6	6	0.333333
142	1	7	1.18	23.1	16.5901	75°	0.161	120	70	0		1	0	0	112	122	0	87	57	0	0	32	0	0	327	448	33	5	5	0.30303
143	0	8	1.12	21.2	16.9005	75°	0.229	115	65	0		1	0	0	116	165	0	90	114	1	0	35	0	0	310	431	35	6	5	0.285714
144	1	9	1.23	23.6	15.5992	25-50°	0.428	110	70	0		1	0	0	76	170	0	87	84	0	0	25	0	0	387	438	37	6	6	0.324324
145	1	10	1.29	26.5	15.9245	25-50°	0.396	120	70	0		1	0	0	82	110	1 (delta)	82	44	0	0	26	0	0	450	527	36	5	5	0.277778
146	1	7	1.11	18.3	14.8527	25°	0.283	120	80	0		1	0	0	101	120	0	97	136	1	0	26	0	0	430	558	37	9	6	0.324324
147	0	12	1.39	35.1	18.1668	50°	0.172	120	70	0		1	0	0	119	152	0	75	112	1	0	30	0	0	375	529	37	6	6	0.324324
148	0	5	1.06	18	16.0199	75°	0.729	110	70	0		1	0	0	109	175	0	80	70	0	0	20	right atrial enlargment	0	347	469	34	9	6	0.352941
149	1	7	1.19	21	14.8295	25°	0.83	100	60	0		1	0	0	100	155	0	107	54	0	0	27	0	0	370	477	33	6	5	0.30303
150	0	40	1.55	45	18.7305	Normal weight	1399	130	80	0	0	1	0	0	118	195	0	90	31	0	1	30	0	0	400	533	60	11	10	0.333333
151	1	7	1.22	20	13.4372	3°	0.816	120	75	0		1	0	0	96	120	1 (delta)	95	57	0	0	38	0	0	387	489	35	5	4	0.228571
152	0	7	1.12	15	11.9579	<3°	0.676	120	80	0		1	0	0	115	157	0	92	64	0	0	30	0	0	340	471	34	5	5	0.294118
153	1	5	1.19	21.3	15.0413	25°	0.291	110	70	0		1	0	0	108	112	1	95	60	0	0	34	0	0	425	572	33	6	6	0.363636
154	0	4	1.12	17	13.5523	3-5°	0.723	120	70	0		1	0	0	81	120	0	85	67	0	0	30	0	0	362	421	34	5	5	0.294118
155	0	5	1.06	19.7	17.5329	90°	0.439	110	70	0		1	0	0	103	165	0	87	58	0	0	34	0	0	402	527	33	6	6	0.363636
156	1	4	1.06	16.5	14.6849	15°	0.366	110	70	0		1	0	0	107	115	1	87	-7	0	0	24	0	0	350	468	37	6	4	0.216216
157	0	8	1.27	26.1	16.182	50°	0.166	110	70	0		1	0	0	110	180	0	100	59	0	0	47	0	0	352	478	35	5	5	0.285714
158	0	6	1.18	18.2	13.071	3°	0.233	120	75	0		1	0	0	131	150	0	77	70	0	0	32	0	0	350	518	36	8	5	0.277778
159	1	6	1.17	19.6	14.3181	15°	0.42	120	80	0		1	0	0	87	145	0	80	47	0	0	27	0	0	440	531	34	6	7	0.411765
160	0	6	1.05	18	16.3265	75°	0.727	100	60	0		1	0	0	110	130	0	76	34	0	0	36	0	0	400	543	36	8	7	0.388889
161	0	40	1.62	57	21.7193	Normal weight	1598	120	80	0	0	1	0	0	63	155	0	102	67	0	0	18	0	0	452	463	45	11	10	0.444444
162	1	37	1.68	43	15.2353	Under weight	1455	130	70	1 (sist 4/6)	0	1	0	0	96	150	0	105	52	0	0	47	left atrial enlargment	0	352	446	58	17	15	0.517241
163	1	6	1.12	18.3	14.5886	25°	0.284	120	70	0		1	0	0	110	152	0	102	45	0	0	30	0	0	422	573	34	6	7	0.411765
164	1	7	1.14	17	13.0809	<3°	0.728	110	70	1 (sist 2/6)		1	0	0	104	192	0	87	81	0	0	24	0	0	435	570	35	5	7	0.4
165	1	11	1.34	27.4	15.2595	15°	0.356	115	65	0		1	0	0	108	102	1	80	60	0	0	36	0	0	342	460	38	5	5	0.263158
166	1	6	1	14.7	14.7	25°	0.429	120	80	0		1	0	0	117	132	0	90	51	0	0	25	0	0	330	462	34	6	7	0.411765
167	0	25	1.58	58	23.2335	Normal weight	1581	120	80	1 (sist 2/6)	0	1	0	0	96	205	0	112	34	0	0	40	0	1	360	455	50	12	9	0.36
168	0	5	1.07	16.9	14.7611	25-50°	0.504	120	70	0		1	0	0	117	152	0	62	24	0	1	25	0	0	322	449	35	6	6	0.342857
169	1	55	1.65	65	23.8751	Normal weight	1712	130	70	0	0	0	0	1	89	0	0	98	83	0	1	23	0	0	364	442	62	11	10	0.322581
170	1	12	1.31	32	18.6469	50-75°	1081	110	70	0		1	0	0	80	104	1	68	22	0	0	14	0	0	360	415	41	6	6	0.292683
171	1	12	1.36	30	16.2197	25°	1.06	100	60	0		1	0	0	88	160	0	105	23	0	0	34	0	0	340	412	35	6	5	0.285714
172	1	10	1.4	31.5	16.0714	25-50°	0.409	120	80	0		1	0	0	95	140	0	97	101	1	0	15	0	0	347	438	39	6	4	0.205128
173	1	12	1.31	27	15.7333	15°	0.986	120	75	1 (sist 2/6)		1	0	0	95	170	0	85	65	0	0	29	0	0	360	453	36	6	6	0.333333
174	1	10	1.23	21	13.8806	3°	0.84	110	70	0		1	0	0	94	112	1	95	-10	0	0	17	0	0	355	446	32	5	4	0.25
175	1	11	1.32	24	13.7741	<3°	0.929	120	80	0		1	0	0	90	120	0	98	81	0	0	23	0	0	320	392	30	7	5	0.333333
176	0	10	1.42	46	22.8129	95°	1356	100	70	0		1	0	0	114	135	0	92	66	0	1	10	0	0	332	458	42	7	6	0.285714
177	0	12	1.44	39	18.8079	50-75°	1248	120	75	0		0	1	0	107	162	0	90	64	0	1	25	0	0	352	471	43	5	4	0.186047
178	0	6	1.1	16	13.2231	3°	0.695	120	80	1 (sist 2/6)		1	0	0	87	142	0	135	-153	1	1	15	0	0	400	482	38	6	6	0.315789
179	0	9	1.29	24	14.4222	15°	0.92	110	70	0		1	0	0	103	135	0	95	53	0	0	33	0	0	357	468	38	6	5	0.263158
180	1	9	1.28	22	13.4277	<3°	0.875	120	70	0		1	0	0	100	132	0	90	111	1	0	25	0	0	360	465	39	6	6	0.307692
181	0	10	1.3	26	15.3846	25°	0.964	100	60	0		1	0	0	132	152	0	66	82	0	0	31	0	0	326	483	40	6	6	0.3
182	0	9	1.27	26	16.12	50°	0.955	110	80	1 (sist 2/6)		1	0	0	107	110	1	92	57	0	1	25	0	0	360	481	32	5	5	0.3125
183	0	9	1.25	21	13.44	3°	0.846	120	70	0		1	0	0	85	122	0	84	70	0	0	29	0	0	405	483	38	6	6	0.315789
184	0	12	1.51	52	22.806	90°	1485	120	80	0		1	0	0	97	130	0	82	82	0	0	18	0	0	347	441	41	8	6	0.292683
185	1	28	1.58	51	20.4294	Normal weight	1497	125	80	0	0	1	0	0	55	192	0	117	38	0	0	17	0	0	360	345	41	10	6	0.292683
186	0	9	1.23	23	15.2026	25°	0.883	110	65	0		1	0	0	99	126	0	74	-40	1	0	19	0	0	408	523	34	7	6	0.352941
187	1	45	1.7	75	25.9516	Over weight	1859	140	90	0	HBP	1	0	0	62	185	0	75	34	0	0	37	0	0	530	540	54	14	8	0.296296
188	0	10	1.3	27	15.9763	25-50°	0.983	110	65	0		0	1	0	93	124	0	64	8	0	0	27	0	0	332	412	40	6	6	0.3
189	1	12	1.42	33	16.3658	25°	1134	120	70	0		1	0	0	96	147	0	102	68	0	1	29	0	0	320	405	40	7	6	0.3
190	0	11	1.53	40	17.0874	50°	1296	110	60	0		1	0	0	77	130	0	92	75	0	1	12	0	0	400	454	38	6	6	0.315789
191	0	34	1.6	50	19.5312	Normal weight	1498	120	70	0	0	1	0	0	86	145	0	97	71	0	0	20	0	0	357	429	45	8	5	0.222222
192	0	9	1.23	23.3	15.4009	25°	0.295	115	70	0		1	0	0	124	112	1	87	82	0	0	21	0	0	375	499	29	6	4	0.275862
193	0	11	1.44	35	16.8789	25-50°	1177	110	70	0		1	0	0	101	125	0	92	65	0	1	12	0	0	360	467	42	8	5	0.238095
194	0	28	1.6	27	10.5469	Under weight	1153	100	65	1 (sist 3/6)		1	0	0	83	210	0	105	67	0	0	27	0	1	467	549	46	10	9	0.391304
195	0	11	1.41	29	14.5868	5°	1055	110	70	0		1	0	0	106	127	0	100	27	0	0	22	0	0	347	462	38	7	6	0.315789
196	0	13	1.52	42.5	18.3951	50°	0.422	120	80	0		1	0	0	80	160	0	90	60	0	0	17	0	0	360	416	39	8	7	0.358974
197	1	10	1.35	33	18.107	75°	1112	110	70	0		1	0	0	88	120	0	100	62	0	0	29	0	0	397	483	36	6	5	0.277778
198	0	9	1.38	39	20.4789	90-95°	1227	120	80	1 (sis 376)		1	0	0	114	136	0	86	44	0	0	45	0	0	314	430	36	8	5	0.277778
199	0	12	1.54	32.5	13.7038	<3°	0.425	110	80	0		1	0	0	96	190	0	77	60	0	0	14	0	0	362	457	37	7	5	0.27027
200	0	12	1.58	45.7	18.3064	50°	0.514	120	80	0		1	0	0	109	155	0	85	2	0	0	18	0	0	332	448	39	7	5	0.25641
201	0	8	1.23	20	13.2196	3°	0.819	110	70	0		1	0	0	90	128	0	103	69	0	0	30	0	0	366	447	40	6	5	0.25
202	1	9	1.27	23.4	14.508	15°	0.349	115	65	0		1	0	0	89	132	0	100	22	0	0	25	0	0	375	458	36	7	6	0.333333
203	0	11	1.42	29	14.3821	5°	1058	120	70	1 (sis 3/6)		1	0	0	80	142	0	92	72	0	0	30	0	0	372	429	37	8	6	0.324324
204	1	10	1.27	24	14.88	15°	0.915	120	70	1 (sis 3/6)		1	0	0	88	200	0	105	99	1	0	11	0	0	385	468	38	7	4	0.210526
205	0	9	1.33	28	15.829	25-50°	1012	110	60	0		0	1	0	81	128	0	86	45	0	0	30	0	0	378	439	40	8	6	0.3
206	0	11	1.39	30	15.5271	25°	1069	120	70	0		1	0	0	96	152	0	97	82	0	0	18	0	0	345	437	37	7	5	0.27027
207	0	9	1.27	25	15.5	25-50°	0.935	120	70	0		1	0	0	100	128	0	68	21	0	0	35	0	0	352	454	39	9	6	0.307692
208	0	8	1.33	26.2	14.8115	25°	0.245	120	80	0		1	0	0	98	167	0	100	75	0	0	24	0	0	397	508	38	6	7	0.368421
209	0	11	1.44	34	16.3966	25-50°	1159	120	70	0		0	1	0	106	140	0	86	106	1	0	20	0	0	334	443	37	8	5	0.27027
210	1	11	1.37	34.6	18.4347	50-75°	0.447	110	70	0		0	1	0	76	122	0	97	47	0	0	29	0	0	402	453	40	7	4	0.2
211	1	9	1.29	31	18.6287	85°	1056	120	80	0		1	0	0	87	147	0	92	66	0	0	32	0	0	342	412	38	9	6	0.315789
212	0	12	1.4	31.7	16.1735	15°	0.49	110	70	0		0	1	0	106	140	0	86	106	0	0	24	0	0	312	412	40	7	6	0.3
213	0	8	1.25	25.4	16.256	50-75°	0.347	110	60	0		1	0	0	122	126	0	68	83	0	0	34	0	0	310	441	36	9	8	0.444444
214	1	11	1.33	27.3	15.4333	15°	0.304	120	70	0		1	0	0	68	132	0	90	50	0	0	18	0	0	375	404	40	7	7	0.35
215	0	10	1.4	31.3	15.9694	25-50°	0.311	120	60	0		0	1	0	87	124	0	66	46	0	0	24	0	0	464	438	43	7	5	0.232558
216	1	11	1.31	27.2	15.8499	25°	0.243	125	60	0		1	0	0	81	137	0	92	65	0	0	19	0	0	352	409	43	5	5	0.232558
217	1	11	1.43	36.5	17.8493	50-75°	0.412	110	60	0		1	0	0	87	135	0	105	75	0	0	17	0	0	382	460	44	6	4	0.181818
218	1	12	1.35	29.6	16.2414	15°	0.445	120	70	0		1	0	0	54	165	0	97	33	0	0	32	0	0	480	458	43	7	5	0.232558
219	1	11	1.28	25.5	15.564	25°	0.395	110	60	0		1	0	0	94	147	0	85	78	0	0	16	0	0	382	478	36	5	5	0.277778
220	0	10	1.46	48	22.5183	95°	1403	120	70	0		1	0	0	133	132	0	72	124	1	0	18	0	0	304	452	42	8	5	0.238095
221	1	12	1.47	36.2	16.7523	25-50°	0.255	110	70	0		0	1	0	90	150	0	97	6	0	0	28	0	0	340	469	46	6	5	0.217391
222	0	13	1.45	37	17.5981	25-50°	1217	95	60	0		1	0	0	117	170	0	112	90	1	0	45	0	0	417	583	43	9	7	0.325581
223	1	10	1.42	34.2	16.9609	50°	0.251	110	60	0		1	0	0	125	132	0	95	54	0	0	20	0	0	380	550	38	5	5	0.263158
224	1	12	1.39	33.8	17.4939	25-50°	0.523	120	70	0		0	1	0	81	160	0	95	42	0	0	24	0	0	370	431	34	7	5	0.294118
225	0	10	1.46	38	17.827	50-75°	1237	110	65	0		0	1	0	97	160	0	95	67	0	0	28	0	0	407	518	43	7	6	0.27907
226	1	10	1.26	22.9	14.4243	5-10°	0.538	130	70	0		0	1	0	78	105	1	97	70	0	0	23	0	0	392	447	37	5	5	0.27027
227	0	10	1.32	29	16.6437	50°	1028	110	70	0		1	0	0	122	127	0	90	2	0	0	26	0	0	382	545	40	5	4	0.2
228	0	10	1.42	27.3	13.539	3°	0.312	125	60	0		1	0	0	116	160	0	95	60	0	0	20	0	0	402	560	37	7	5	0.27027
229	0	10	1.46	34	15.9505	25-50°	1166	120	80	0		1	0	0	96	132	0	100	-43	1	0	28	0	0	370	469	40	6	5	0.25
230	0	11	1.25	27	17.28	50°	0.968	110	60	0		0	1	0	88	127	0	87	63	0	0	32	0	0	462	561	31	6	4	0.258065
231	0	43	1.51	50	21.9289	Normal weight	1436	130	70	0	0	1	0	0	86	140	0	82	48	0	0	17	0	0	387	464	42	12	6	0.285714
232	0	52	1.55	68	28.3039	Over weight	1668	120	70	0	0	1	0	0	80	157	0	90	18	0	0	12	0	0	400	473	48	8	7	0.291667
233	0	46	1.58	58	23.2335	Normal weight	1581	110	70	0	0	1	0	0	94	182	0	100	18	0	0	33	right atrial enlargment	0	360	451	48	9	7	0.291667
234	1	4	0.95	14.2	15.7341	50°	0.214	120	70	0		1	0	0	136	145	0	87	44	0	0	19	0	0	350	527	30	5	5	0.333333
235	0	4	0.96	12.7	13.7804	5°	0.422	105	85	1 (2/6 sist)		1	0	0	111	135	0	92	56	0	1	22	0	0	355	484	30	5	5	0.333333
236	1	4	0.92	16	18.9036	>97°	0.647	110	60	0		0	1	0	116	115	1	100	114	1	0	22	0	0	332	461	35	5	6	0.342857
237	1	5	1.06	16	14.2399	10°	0.685	110	60	0		1	0	0	117	130	0	92	71	0	0	18	0	0	310	434	33	6	4	0.242424
238	1	4	1	15.4	15.4	50°	0.317	100	70	0		1	0	0	131	127	0	87	80	0	0	21	0	0	360	532	31	6	4	0.258065
239	0	5	1.12	18.8	14.9872	25-50°	0.482	120	80	0		1	0	0	106	135	0	90	116	1	1	15	0	0	360	478	39	4	4	0.205128
240	0	6	1.04	15.3	14.1457	15°	0.276	110	70	0		1	0	0	92	167	0	85	61	0	1	26	0	0	360	465	38	5	4	0.210526
241	1	5	1.01	15.5	15.1946	50°	0.359	100	60	0		1	0	0	110	130	0	80	65	0	0	13	0	0	345	467	34	6	6	0.352941
242	1	6	1.01	14	13.7241	5°	0.625	120	80	1 (2/6 sist)		1	0	0	102	122	0	87	59	0	1	20	0	0	362	473	30	5	4	0.266667
243	1	4	0.99	13.6	13.8761	3-5°	0.393	100	60	0		1	0	0	150	110	1	87	83	0	1	16	0	0	327	517	33	5	4	0.242424
244	0	5	1.27	30.3	18.786	97°	0.299	100	60	0		1	0	0	105	192	0	97	35	0	0	16	0	0	360	476	38	7	6	0.315789
245	0	5	1.03	15.5	14.6102	25°	0.362	100	70	0		1	0	0	103	190	0	95	65	0	0	26	0	0	340	447	34	6	5	0.294118
246	1	4	1.02	15.5	14.8981	25°	0.361	120	80	0		1	0	0	118	120	0	92	53	0	1	13	0	0	395	594	33	5	5	0.30303
247	1	5	1.03	14.3	13.4791	3°	0.275	110	70	0		1	0	0	105	187	0	75	109	1	1	28	0	0	349	459	35	5	6	0.342857
248	1	4	1.01	15.3	14.9985	25°	0.273	100	70	0		1	0	0	127	155	0	102	14	0	0	11	0	0	360	476	35	5	6	0.342857
249	0	5	1.03	14.6	13.7619	10°	0.399	90	60	0		1	0	0	140	115	1	90	84	0	0	15	0	0	345	527	33	4	4	0.242424
250	0	5	0.97	16.5	17.5364	90°	0.354	110	60	0		1	0	0	109	152	0	82	30	0	0	16	0	0	370	500	33	4	5	0.30303
251	0	4	0.92	13	15.3592	50°	0.579	100	60	0		1	0	0	111	175	0	77	56	0	0	16	0	0	360	490	34	6	6	0.352941
252	0	5	1	13.5	13.5	10°	0.358	110	60	0		1	0	0	106	122	0	85	10	0	1	15	0	0	335	445	30	5	5	0.333333
253	1	4	0.99	14.7	14.9985	25°	0.427	100	60	0		1	0	0	113	137	0	87	17	0	0	13	0	0	405	556	35	5	5	0.285714
254	1	4	1.01	13.6	13.332	3°	0.396	110	70	0		0	1	0	120	140	0	80	60	0	0	26	0	0	360	509	33	6	6	0.363636
255	0	5	0.99	13.7	13.9782	15°	0.427	110	70	1 (2/6 sist)		1	0	0	103	137	0	85	82	0	0	25	0	0	345	454	28	5	9	0.642857
256	1	4	0.98	12.2	12.703	<3°	0.217	90	50	0		1	0	0	145	182	0	87	45	0	0	17	0	0	422	656	33	5	6	0.363636
257	1	12	1.35	33	18.107	50°	1112	110	70	0		1	0	0	79	157	0	95	62	0	0	27	0	0	382	439	48	6	4	0.166667
258	1	8	1.14	19.7	15.1585	25-50°	0.452	100	50	0		0	1	0	104	162	0	92	58	0	0	26	0	0	370	487	40	4	4	0.2
259	0	8	1.25	22.4	14.336	15°	0.347	110	70	0		1	0	0	82	135	0	85	72	0	1	29	0	0	377	441	37	6	6	0.324324
260	0	12	1.33	29.2	16.5074	25°	0.245	120	70	0		1	0	0	98	142	0	92	25	0	0	38	0	0	350	448	47	7	5	0.212766
261	0	8	1.3	26.5	15.6805	50°	0.397	110	60	1 (2/6 sist)		0	1	0	116	135	0	93	11	0	1	33	0	0	320	445	37	7	6	0.324324
262	0	7	1.06	16.5	14.6849	25°	0.366	105	65	0		1	0	0	114	175	0	100	54	0	1	11	0	0	320	441	30	6	5	0.333333
263	0	8	1.18	22.3	16.0155	50°	0.29	120	70	0		1	0	0	100	137	0	90	94	1	0	11	0	0	390	503	40	5	4	0.2
264	1	6	1.07	16.1	14.0624	10°	0.155	90	60	0		1	0	0	108	177	0	92	53	0	0	35	0	0	320	429	33	5	4	0.242424
265	0	9	1.1	27.1	22.3967	97°	0.156	120	70	0		1	0	0	82	155	0	110	32	0	0	19	0	0	395	463	40	7	5	0.25
266	1	12	1.35	32.3	17.7229	50°	0.306	110	70	0		1	0	0	90	165	0	90	62	0	1	30	0	0	360	441	42	7	5	0.238095
267	0	10	1.37	33	17.5822	50-75°	1118	120	80	0		1	0	0	123	127	0	80	1	0	0	14	0	0	370	530	36	7	8	0.444444
268	0	15	1.53	39	16.6603	5°	1278	120	60	0		0	1	0	106	142	0	90	61	0	1	29	0	0	369	489	44	9	6	0.272727
269	1	7	1.06	17.5	15.5749	50°	0.366	110	70	1 (2/6 sist)		0	1	0	93	132	0	82	68	0	0	33	0	0	427	532	36	6	5	0.277778
270	0	13	1.42	33.8	16.7625	25°	0.529	95	60	0		1	0	0	113	135	0	107	28	0	1	34	0	0	360	448	42	11	9	0.428571
271	1	11	1.3	24.7	14.6154	5°	0.476	120	80	0		1	0	0	117	137	0	102	64	0	0	30	0	0	325	455	38	6	4	0.210526
272	0	5	1.06	15.7	13.9729	15°	0.439	110	70	0		1	0	0	92	170	0	87	85	0	0	9	0	0	352	435	30	5	4	0.266667
273	0	10	1.31	23.6	13.7521	5°	0.918	110	60	1 (2/6 sist)		1	0	0	75	147	0	105	-33	1	1	8	0	0	437	488	32	6	5	0.3125
274	0	6	1.1	19.5	16.1157	75°	0.372	120	70	0		1	0	0	127	112	1	95	33	0	1	35	0	0	312	454	32	5	4	0.25
275	0	10	1.28	26.2	15.9912	25-50°	0.241	110	70	1 (2/6 sist)		1	0	0	110	177	0	92	100	1	1	18	0	0	417	545	33	5	5	0.30303
276	1	7	1.26	23.9	15.0542	25-50°	0.538	100	60	0		1	0	0	93	215	0	90	61	0	0	0	0	1	360	448	36	5	6	0.333333
277	0	10	1.3	26.5	15.6805	25°	0.397	90	60	0		1	0	0	93	152	0	92	64	0	0	20	0	0	390	485	32	6	5	0.3125
278	1	13	1.51	43.4	19.0343	50-75°	0.374	100	60	0		1	0	0	117	150	0	95	61	0	0	18	0	0	400	559	44	8	6	0.272727
279	1	13	1.46	36.8	17.264	25-50°	0.535	110	70	0		1	0	0	94	187	0	97	73	0	1	26	0	0	365	457	42	7	6	0.285714
280	1	10	1.29	23.5	14.1217	5°	0.396	120	80	0		1	0	0	87	137	0	107	6	0	1	17	0	0	400	484	34	6	5	0.294118
281	1	10	1.36	27.9	15.0843	15°	0.555	125	70	0		1	0	0	110	130	0	90	66	0	0	20	0	0	415	563	35	6	4	0.228571
282	1	11	1.41	29.7	14.9389	10°	0.491	110	60	0		1	0	0	120	135	0	97	10	0	1	28	0	0	395	560	40	7	5	0.25
283	1	11	1.36	28.3	15.3006	15°	0.307	90	60	0		1	0	0	71	175	0	87	55	0	0	11	0	0	507	551	40	7	6	0.3
284	1	11	1.36	27.5	14.8681	10°	0.404	110	80	0		1	0	0	98	120	0	97	61	0	0	22	0	0	370	472	38	5	4	0.210526
285	1	11	1.45	29.1	13.8407	3°	0.174	120	80	0		1	0	0	63	140	0	102	37	0	0	12	0	0	427	439	38	6	6	0.315789
286	1	12	1.41	31	15.5928	15°	1094	110	75	0		1	0	0	123	137	0	92	91	1	1	19	0	0	382	547	40	6	6	0.3
287	1	11	1.22	26	17.4684	50-75°	0.94	120	80	0		1	0	0	90	137	0	82	51	0	0	12	0	0	415	508	39	6	5	0.25641
288	1	7	1.11	17.4	14.1222	10°	0.331	115	75	0		1	0	0	101	130	0	97	31	0	0	30	0	0	452	587	34	4	4	0.235294
289	0	5	1.1	15.7	12.9752	3°	0.445	120	70	0		0	1	0	110	180	0	105	-57	1	0	14	0	0	332	450	33	5	4	0.242424
290	0	8	1.15	18	13.6106	5°	0.753	120	80	1 (2/6 sist)		1	0	0	106	127	0	95	92	1	0	35	0	0	432	574	30	5	5	0.333333
291	1	10	1.28	21.4	13.0615	<3°	0.35	110	70	0		1	0	0	103	192	0	97	86	0	0	31	0	0	445	583	35	5	5	0.285714
292	1	4	0.88	12	15.4959	50°	0.545	90	60	0		1	0	0	126	157	0	92	47	0	1	13	0	0	377	547	29	5	4	0.275862
293	1	5	1.04	16	14.7929	25°	0.679	110	70	0		1	0	0	103	190	0	85	47	0	0	27	0	0	365	480	32	5	5	0.3125
294	0	5	0.93	11.7	13.5276	5°	0.417	120	70	1 (2/6 sist)		1	0	0	123	160	0	87	72	0	0	33	0	0	377	541	34	6	4	0.235294
295	0	4	0.87	12	15.8541	50-75°	0.542	110	60	0		0	1	0	89	150	0	75	80	0	0	13	0	0	367	448	30	5	4	0.266667
296	1	5	0.95	14.5	16.0665	75°	0.351	100	50	0		1	0	0	114	147	0	92	69	0	0	29	0	0	405	560	31	4	4	0.258065
297	0	4	0.97	12.5	13.2852	3°	0.354	110	70	0		1	0	0	135	110	1	92	52	0	0	16	0	0	357	536	26	4	4	0.307692
298	1	4	0.88	11	14.2045	10°	0.52	100	60	0		1	0	0	90	155	0	80	25	0	0	19	0	0	475	584	30	5	5	0.333333
299	1	5	1.02	14.3	13.7447	5°	0.274	120	70	0		1	0	0	102	192	0	92	76	0	0	16	0	0	442	576	29	5	4	0.275862
300	0	13	1.47	37.6	17.4002	25°	0.46	110	70	0		1	0	0	112	145	0	100	50	0	0	11	0	0	420	574	42	7	4	0.190476
301	0	52	1.61	79.5	30.6701	Over weight	0.565	130	75	0		1	0	0	94	210	0	112	14	0	0	20	0	1	490	616	48	9	8	0.333333
302	0	4	0.94	12.9	14.5994	25°	0.479	110	70	1 (2/6 sist)		1	0	0	101	145	0	97	114	1	1	12	0	0	352	458	38	8	6	0.315789
303	0	15	1.58	46	18.4265	25°	1415	120	80	0		1	0	0	97	205	0	95	35	0	0	11	0	0	425	541	42	8	7	0.333333
304	0	15	1.62	41.5	15.8131	<3°	0.433	110	80	0		0	1	0	66	127	0	97	60	0	0	14	0	0	440	462	40	6	5	0.25
305	0	6	1.2	18.7	12.9861	3°	0.461	110	60	0		1	0	0	88	195	0	92	77	0	0	18	0	0	437	531	33	4	4	0.242424
306	0	68	1.63	58.5	22.0181	Normal weight	0.57	120	65	0		1	0	0	113	162	0	102	56	0	1	20	0	0	400	549	38	13	8	0.421053
307	0	48	1.65	90	33.0579	Over weight	1966	130	70	0		1	0	0	52	197	0	95	12	0	1	28	0	0	390	363	45	13	12	0.533333
308	0	42	1.59	74.5	29.4688	Over weight	0.56	110	70	0		1	0	0	88	222	0	110	3	0	0	22	0	1	400	484	46	7	8	0.347826
309	0	33	1.58	47	18.8271	Normal weight	1446	120	70	0		1	0	0	81	152	0	85	37	0	1	14	0	0	375	437	40	5	5	0.25
310	0	31	1.61	68.3	26.3493	Over weight	0.455	110	70	0		1	0	0	83	165	0	77	53	0	0	23	0	0	382	450	41	8	7	0.341463
311	0	38	1.54	60.2	25.3837	Over weight	0.371	130	70	0		1	0	0	105	182	0	97	43	0	0	15	0	0	445	590	44	8	6	0.272727
312	0	22	1.51	61.5	26.9725	Over weight	0.54	110	70	0		1	0	0	76	117	1	95	65	0	1	11	0	0	562	636	41	8	7	0.341463
313	0	30	1.69	56	19.6072	Normal weight	1635	120	80	0		1	0	0	91	177	0	95	64	0	0	16	0	0	487	601	43	7	7	0.325581
314	0	23	1.58	60	24.0346	Normal weight	1604	130	70	0		1	0	0	78	195	0	87	44	0	0	17	0	0	545	623	43	7	7	0.325581
315	0	36	1.47	36	16.6597	Under weight	1225	110	70	0		1	0	0	90	205	0	92	74	0	0	12	0	0	490	600	43	6	7	0.325581
316	0	31	1.61	58.2	22.4528	Normal weight	0.383	120	80	0		1	0	0	91	200	0	95	57	0	0	8	0	0	487	601	40	6	7	0.35
317	1	57	1.67	75.5	27.0716	Over weight	0.581	140	90	0		1	0	0	61	172	0	92	8	0	0	17	0	0	517	523	46	10	6	0.26087
318	0	30	1.52	39.1	16.9235	Under weight	1937	120	65	0		1	0	0	109	180	0	100	48	0	0	26	0	0	327	442	41	7	6	0.292683
319	1	4	0.76	11.7	20.2562	>97°	0.385	100	65	0		0	1	0	142	140	0	95	101	1	0	23	0	0	360	555	31	4	5	0.322581
320	0	6	1.13	15	11.7472	<3°	0.678	110	70	0		1	0	0	134	127	0	82	84	0	1	19	0	0	347	520	32	4	4	0.25
321	0	4	1.34	20	11.1383	<3°	0.847	120	70	0		0	1	0	76	167	0	95	22	0	0	28	0	0	400	452	34	6	5	0.294118
322	0	4	0.96	13.3	14.4314	15°	0.268	120	60	0		1	0	0	102	195	0	100	-21	0	0	15	0	0	452	589	28	4	4	0.285714
323	1	11	1.46	32	15.0122	10°	1128	110	70	0		1	0	0	105	110	1	95	59	0	0	29	0	0	395	523	36	7	5	0.277778
324	1	11	1.27	24.5	15.19	10°	0.393	120	80	0		0	1	0	86	197	0	82	45	0	0	23	left atrial enlargment	0	377	453	35	5	3	0.171429
325	1	11	1.37	29	15.451	15°	1043	110	60	0		1	0	0	108	135	0	87	52	0	0	38	0	0	345	464	38	5	4	0.210526
326	1	11	1.3	27	15.9763	25°	0.983	130	60	0		1	0	0	94	152	0	102	104	1	0	16	0	0	370	463	39	5	4	0.205128
327	1	11	1.31	24.5	14.2766	3°	0.398	110	60	0		1	0	0	106	147	0	90	98	1	0	15	0	0	327	436	35	5	4	0.228571
328	1	9	1.2	22	15.2778	25°	0.853	120	70	0		1	0	0	106	110	1	92	66	0	0	35	0	0	350	466	33	5	5	0.30303
329	1	9	1.27	20	12.4	<3°	0.829	105	60	0		0	1	0	96	152	0	105	85	0	0	27	0	0	365	463	36	5	5	0.277778
330	1	10	1.31	32	18.6469	75-85°	1081	110	70	0		1	0	0	117	170	0	105	94	1	0	14	0	0	340	476	35	6	5	0.285714
331	1	9	1.32	24	13.7741	3°	0.929	120	70	0		1	0	0	92	155	0	97	67	0	0	16	0	0	382	473	32	6	5	0.3125
332	1	9	1.34	25	13.9229	5°	0.955	110	80	0		1	0	0	104	152	0	97	40	0	1	20	0	0	347	457	35	6	6	0.342857
333	1	9	1.29	26	15.6241	25-50°	0.961	100	70	0		1	0	0	77	142	0	90	83	0	0	24	0	0	407	463	37	5	4	0.216216
334	1	9	1.22	24.6	16.5278	50-75°	0.427	90	60	0		1	0	0	89	150	0	100	93	1	1	16	0	0	375	458	36	5	5	0.277778
335	1	10	1.38	29.5	15.4904	25°	0.407	100	50	0		1	0	0	82	172	0	92	56	0	0	11	0	0	452	533	37	6	4	0.216216
336	1	9	1.34	29	16.1506	50°	1034	120	70	0		1	0	0	109	160	0	100	42	0	0	31	0	0	347	469	35	8	4	0.228571
337	1	9	1.37	40	21.3117	97°	1.24	110	60	0		1	0	0	92	170	0	97	25	0	0	27	0	0	370	458	40	5	5	0.25
338	1	9	1.24	21.5	13.9828	5°	0.39	120	80	0		1	0	0	104	125	0	97	34	0	1	18	0	0	330	435	31	5	4	0.258065
339	0	10	1.29	23	13.8213	5°	0.899	100	60	0		1	0	0	108	140	0	87	75	0	0	10	0	0	340	457	29	6	5	0.344828
340	0	10	1.48	39.5	18.0332	50-75°	0.418	120	70	1 (2/6 sist)		1	0	0	91	202	0	90	40	0	0	20	0	0	364	450	32	6	6	0.375
341	0	9	1.19	19.5	13.7702	5°	0.383	110	70	0		1	0	0	103	192	0	90	15	0	1	13	0	0	357	468	31	4	4	0.258065
342	0	9	1.29	26.5	15.9245	25-50°	0.396	100	60	0		1	0	0	103	117	1	102	65	0	0	32	0	0	432	566	39	6	5	0.25641
343	0	9	1.32	31	17.7916	75°	1066	100	60	0		0	1	0	93	165	0	97	76	0	0	14	0	0	372	465	34	6	4	0.235294
344	0	35	1.55	62.5	26.0146	Over weight	0.55	135	90	0		1	0	0	76	147	0	100	53	0	1	20	0	0	412	465	45	9	6	0.266667
345	0	9	1.27	25	15.5	25-50°	0.935	110	70	0		1	0	0	108	117	1	92	55	0	0	15	0	0	425	470	36	6	6	0.333333
346	1	9	1.34	27	15.0368	25°	0.995	110	70	0		0	1	0	89	122	0	90	56	0	0	38	0	0	352	431	35	5	5	0.285714
347	1	10	1.27	26	16.12	25-50°	0.955	125	65	0		1	0	0	65	100	1	97	103	1	0	25	0	0	395	414	34	4	4	0.235294
348	0	10	1.21	23.5	16.0508	25-50°	0.386	110	70	0		1	0	0	90	130	0	87	46	0	0	26	0	0	347	425	36	4	6	0.333333
349	1	10	1.35	27	14.8148	15°	0.998	120	70	0		0	1	0	89	127	0	97	82	0	0	25	0	0	497	607	33	6	5	0.30303
350	0	10	1.25	24.5	15.68	25°	0.391	90	60	0		1	0	0	109	180	0	92	46	0	0	31	0	0	395	534	36	6	5	0.277778
351	1	12	1.39	30	15.5271	10°	1069	110	60	0		0	1	0	73	157	0	90	64	0	0	37	0	0	410	454	37	6	5	0.27027
352	1	9	1.22	20	13.4372	<3°	0.816	120	60	0		0	1	0	100	122	0	97	74	0	0	12	0	0	457	589	28	5	5	0.357143
353	1	12	1.46	32	15.0122	5°	1128	100	60	0		1	0	0	90	127	0	95	82	0	0	15	0	0	355	436	35	6	6	0.342857
354	1	9	1.42	32.5	16.1178	50°	0.411	110	70	0		1	0	0	83	132	0	80	72	0	0	25	0	0	452	531	34	6	5	0.294118
355	1	10	1.44	35	16.8789	50-75°	1177	110	60	0		1	0	0	91	135	0	95	82	0	0	19	0	0	465	574	40	7	5	0.25
356	1	10	1.28	20	12.207	<3°	0.832	120	80	0		1	0	0	150	120	0	85	60	0	0	24	0	0	240	354	28	6	5	0.357143
